# Supplementary material
Source: PubMed Central journal article supplement (PMC10908547)
Supplement: NIHMS1966658-supplement-1.pdf [file NIHMS1966658-supplement-1.pdf]

**Table S1. Expression of *Ubtf* and rRNA by Nestin-Cre Mice**

|                          | <i>Ubtf</i> <sup>+/+</sup> Liver | Nestin-Cre Liver | <i>Ubtf</i> <sup>+/+</sup> Hippocampus | Nestin-Cre Hippocampus |
|--------------------------|----------------------------------|------------------|----------------------------------------|------------------------|
| <b><i>Ubtf</i> Total</b> | 1.01±0.02                        | 1.18±0.04*       | 2.14±0.03                              | 1.35±0.14*             |
| <b><i>Ubtf1</i></b>      | 1.01±0.03                        | 1.14±0.05        | 3.53±0.23                              | 2.54±0.14*             |
| <b>18S rRNA</b>          | 1.01±0.02                        | 1.13±0.06        | 0.57±0.01                              | 0.41±0.03*             |
| <b>28S rRNA</b>          | 1.01±0.01                        | 1.34±0.05*       | 0.79±0.05                              | 0.56±0.02*             |
| <b>45S rRNA</b>          | 1.01±0.02                        | 1.38±0.04*       | 1.46±0.06                              | 0.97±0.04*             |

\**P* < 0.05

**Table S2. *Ubtf* Knockdown in Adult Mice**

|                                            | <i>Ubtf</i> <sup>+/+</sup> (n=5) | <i>Ubtf</i> <sup>f/f</sup> CreERT2 (n=2)<br>+Tamoxifen | <i>Ubtf</i> <sup>f/f</sup> CreERT2 (n=2)<br>-Tamoxifen |
|--------------------------------------------|----------------------------------|--------------------------------------------------------|--------------------------------------------------------|
| <b>Weight (g) before injection</b>         | 27.0 ± 0.8*                      | 36.7 ± 1.3                                             | 30.6 ± 0.3                                             |
| <b>Weight (g) 8 days of 1st injection</b>  | 26.7 ± 0.7                       | 24.6 ± 1.6                                             | 29.3 ± 0.4                                             |
| <b>Grip strength/weight (g/g)</b>          | 12.4 ± 0.3                       | 9.6 ± 0.6                                              | 14.4 ± 0.8                                             |
| <b>Open field activity</b>                 |                                  |                                                        |                                                        |
| <i>Distance traveled (cm)</i>              | 937.6 ± 130.8                    | 411.6 ± 139.4                                          | 793.5 ± 76.4                                           |
| <i>Ambulatory count</i>                    | 450.1 ± 76.7                     | 163.0 ± 64.2                                           | 380.8 ± 40.7                                           |
| <i>Stereotypic Count</i>                   | 1556.4 ± 150.3                   | 499.3 ± 109.4                                          | 1054.3 ± 70.1                                          |
| <i>Vertical count</i>                      | 79.0 ± 10.1                      | 6.0 ± 3.8                                              | 30.8 ± 4.5                                             |
| <i>Jump count</i>                          | 23.8 ± 6.8                       | 0 ± 0                                                  | 13.3 ± 3.5                                             |
| <i>Average velocity (cm/s)</i>             | 35.5 ± 2.9                       | 27.3 ± 6.3                                             | 26.2 ± 6.1                                             |
| <i>Ambulatory episodes</i>                 | 41.7 ± 6.4                       | 14.5 ± 5.8                                             | 34.8 ± 3.9                                             |
| <b>DigiGait™</b>                           |                                  |                                                        |                                                        |
| <i>Propel (s) Forelimb</i>                 | 0.125 ± 0.003                    | 0.144 ± 0.003                                          | 0.130 ± 0.004                                          |
| <i>Propel (s) Hindlimb</i>                 | 0.197 ± 0.003                    | 0.199 ± 0.002                                          | 0.195 ± 0.002                                          |
| <i>Stride length (cm) Forelimb</i>         | 7.13 ± 0.13                      | 6.03 ± 0.10                                            | 6.84 ± 0.11                                            |
| <i>Stride length (cm) Hindlimb</i>         | 7.00 ± 0.09                      | 5.91 ± 0.08                                            | 6.77 ± 0.06                                            |
| <i>Stride Frequency (steps/s) Forelimb</i> | 2.69 ± 0.04                      | 2.86 ± 0.03                                            | 2.74 ± 0.05                                            |
| <i>Stride Frequency (steps/s) Hindlimb</i> | 2.73 ± 0.04                      | 2.90 ± 0.04                                            | 2.77 ± 0.02                                            |
| <i>Stance width (cm) Forelimb</i>          | 1.70 ± 0.02                      | 1.82 ± 0.03                                            | 1.80 ± 0.03                                            |
| <i>Stance width (cm) Hindlimb</i>          | 2.46 ± 0.05                      | 2.40 ± 0.04                                            | 2.41 ± 0.02                                            |
| <i>Paw Area (cm<sup>2</sup>) Forelimb</i>  | 0.41 ± 0.01                      | 0.35 ± 0.01                                            | 0.39 ± 0.01                                            |
| <i>Paw Area (cm<sup>2</sup>) Hindlimb</i>  | 0.67 ± 0.01                      | 0.62 ± 0.01                                            | 0.65 ± 0.01                                            |
| <b>Total <i>Ubtf</i>, cerebral cortex</b>  | 1.00 ± 0.05                      | 0.08 ± 0.01                                            | 0.98 ± 0.07                                            |
| <b>Total <i>Ubtf</i>, cerebellum</b>       | 1.54 ± 0.06                      | 0.12 ± 0.01                                            | 1.41 ± 0.05                                            |
| <b>Total <i>Ubtf</i>, striatum</b>         | 0.72 ± 0.04                      | 0.10 ± 0.01                                            | 0.67 ± 0.06                                            |
| <b>Total <i>Ubtf</i>, liver</b>            | 0.67 ± 0.03                      | 0.03 ± 0.01                                            | 0.65 ± 0.03                                            |

\*Values are means ± SEM

**Table S3. Primers for Relative Quantitative RT-PCR (QRT-PCR)**

| Primer           | Sequence (5'→3')       | Locus                   | Usage                  | Product (bp)            |
|------------------|------------------------|-------------------------|------------------------|-------------------------|
| <b>UbtF_p85F</b> | gaacggagaagcggactg     | NM_011551.6 319 - 336   |                        |                         |
| <b>UbtF_p85R</b> | tccagcagagtcagcatatctt | NM_011551.6 411 - 390   | QRT-PCR (all isoforms) | 93 (with UbtF_p85F)     |
| <b>UbtF_p9F</b>  | agcgggaaggagtacgagga   | NM_011551.6 1071 - 1089 |                        |                         |
| <b>UbtF_p9R</b>  | tcgaactgtccttgagctg    | NM_011551.6 1197 - 1178 | QRT-PCR (isoform 1)    | 127 (with UbtF_p9F)     |
| <b>M18S_p74F</b> | aaacggctaccacatccaag   | NR_003278.3 448 - 467   |                        |                         |
| <b>M18S_p74R</b> | tacagggcctcgaagagtc    | NR_003278.3 555 - 536   | QRT-PCR (18S)          | 108 (with<br>M18S_p74F) |
| <b>M28S_p15F</b> | gggttagaccgtcgtgaga    | NR_003279.1 4179 - 4198 |                        |                         |
| <b>M28S_p15R</b> | agccaagcacatacaccaaa   | NR_003279.1 4298 - 4279 | QRT-PCR (28S)          | 120 (with<br>M28S_p15F) |
| <b>M45S_p18F</b> | cccacacgtgtctcgtttc    | NR_046233.2 6722 - 6740 |                        |                         |
| <b>M45S_p18R</b> | cagatggaccgaggggtag    | NR_046233.2 6781 - 6763 | QRT-PCR (45S)          | 60 (with<br>M45S_p18F)  |

Numbers embedded within QRT-PCR primer names refer to universal probe numbers for the Roche LightCycler® 480 System.

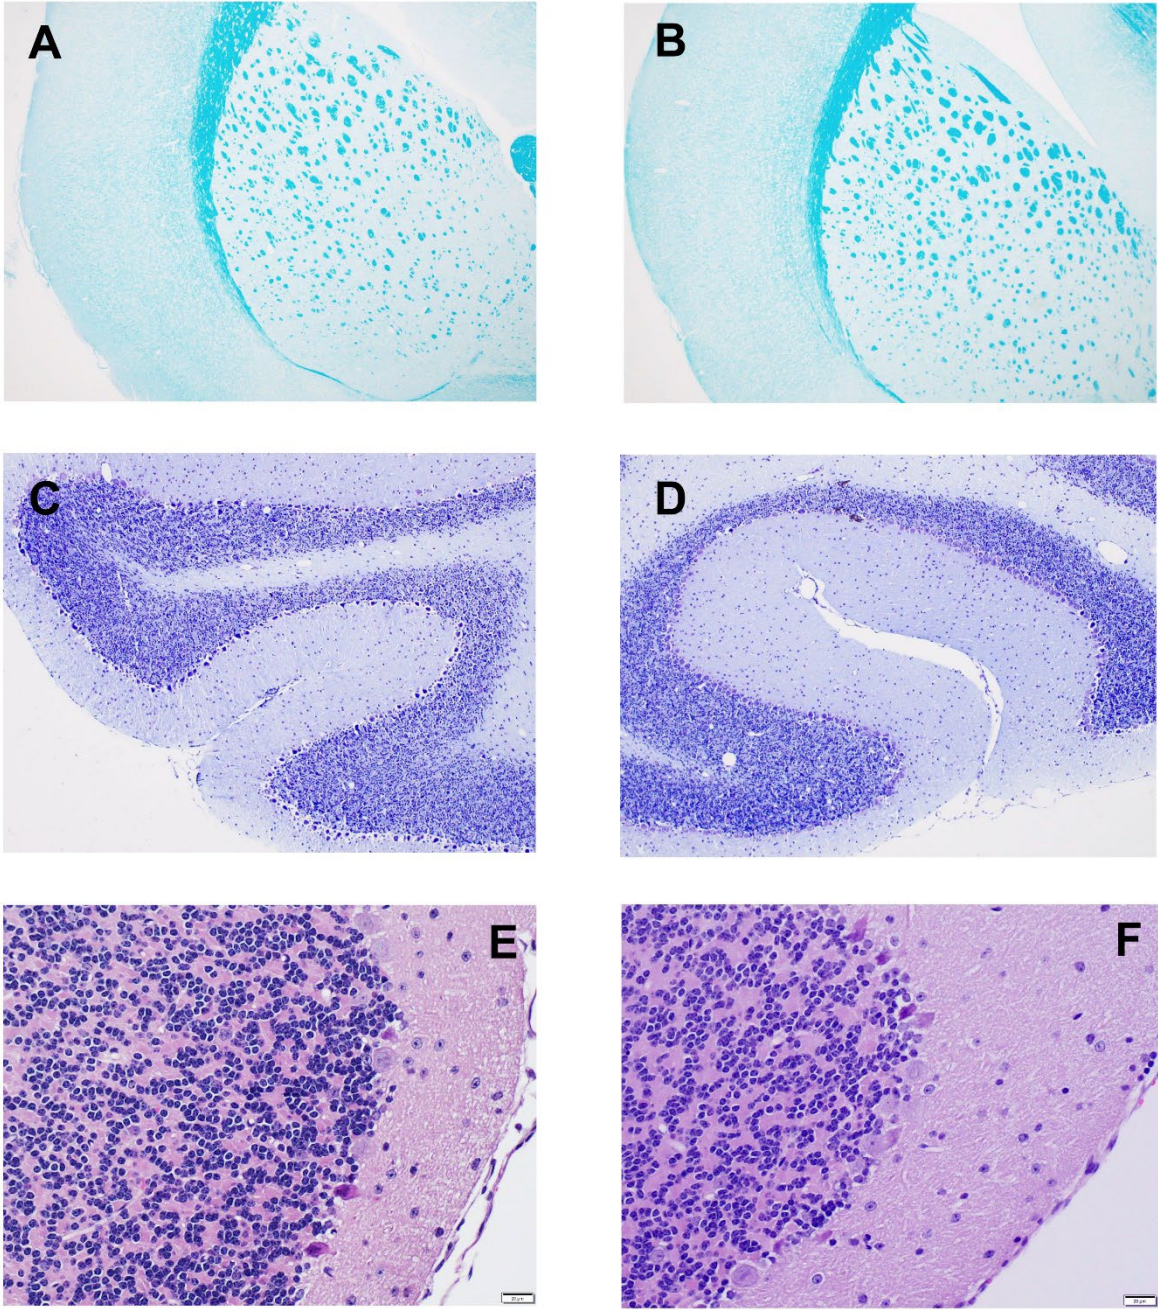

**Figure S1. Post-mortem Histology at 18 months in *Ubtfl*<sup>-/-</sup> and *Ubtfl*<sup>+/+</sup> Mice.** *Ubtfl*<sup>-/-</sup> (A, C and E). *Ubtfl*<sup>+/+</sup> (B, D and F). Luxol fast blue (A and B). Cresyl violet (C and D). Hematoxylin & Eosin (E and F).
